# Supplementary material for: Isomorphous Co(ii) and Ni(ii) antiferromagnets based on mixed azide- and carboxylate-bridged chains: metamagnetism and single-chain dynamics
Source: Royal Society of Chemistry journal article supplement (doi:10.1039/c1dt11068c), 2011-01-01
Supplement: c1dt11068c.pdf [file c1dt11068c.pdf]

## Electronic supplementary information (ESI)

### Isomorphous Co(II) and Ni(II) antiferromagnets based on mixed azide- and carboxylate-bridged chains: metamagnetism and single-chain dynamics

*Xiu-Mei Zhang, Kun Wang, Yan-Qin Wang, and En-Qing Gao\**

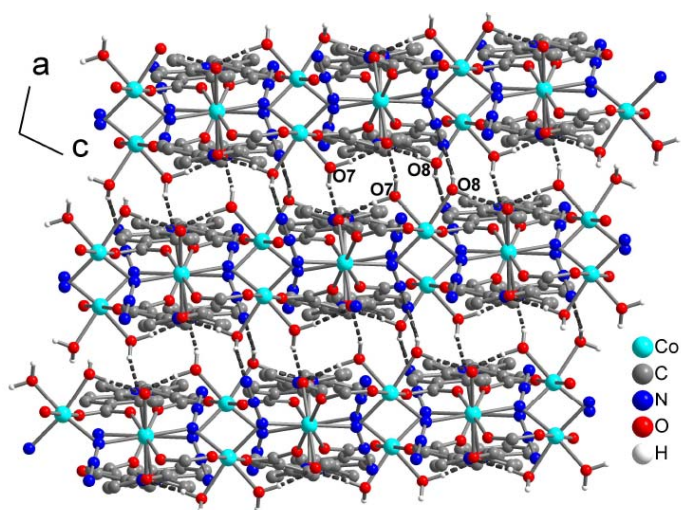

**Fig. S1.** 3D packing of the layers through hydrogen bonding interactions in **1**.

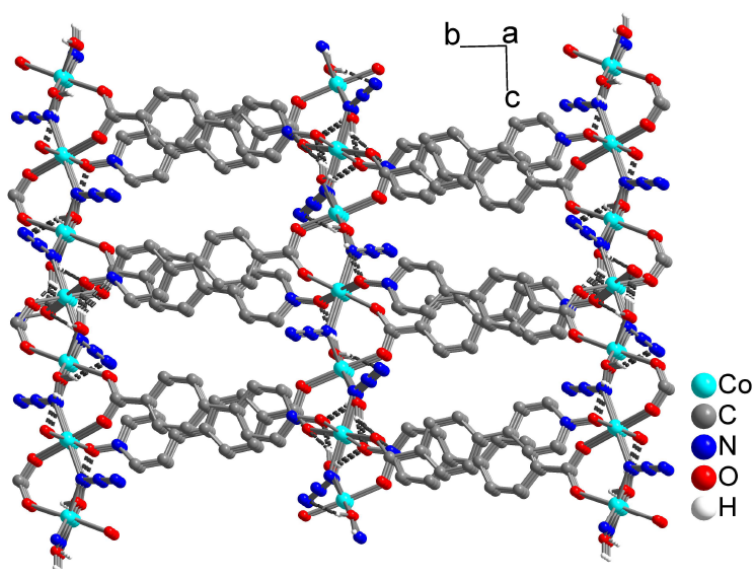

**Fig. S2.** The 3D hydrogen bonding network in **1**.

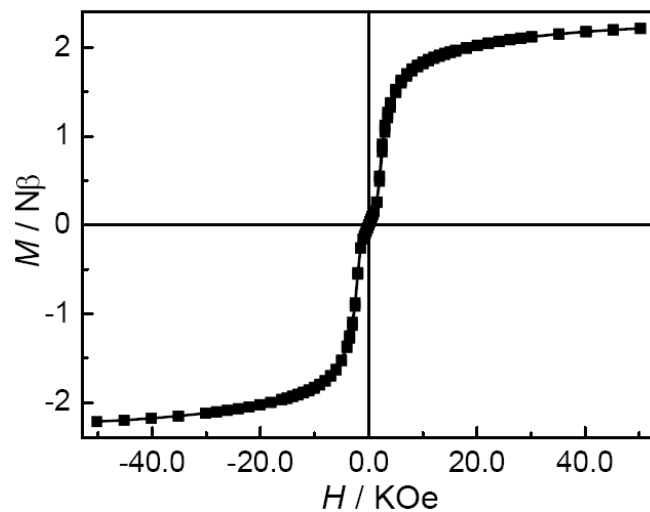

**Fig. S3.** Isothermal magnetization of **2** at 2 K.

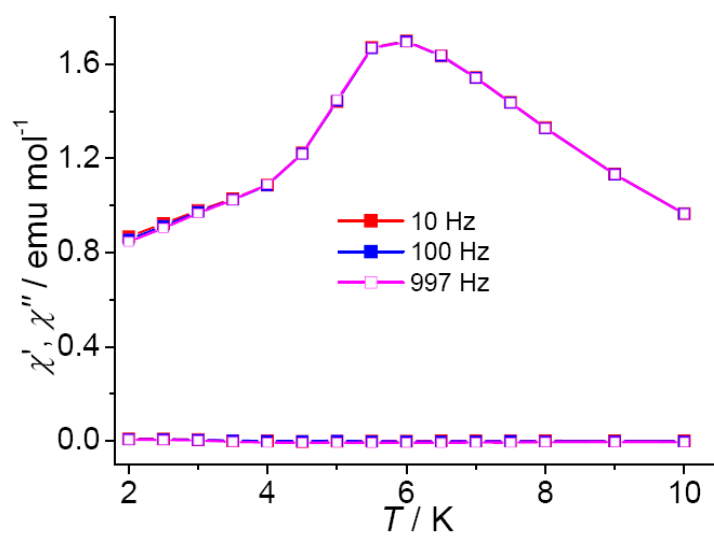

**Fig. S4.**  $\chi'$  and  $\chi''$  plot for **2** at frequencies 10, 100 and 997 Hz with  $H_{\text{dc}} = 0$  and  $H_{\text{ac}} = 3.5$  Oe.
